# Supplementary material
Source: PubMed Central journal article supplement (PMC3487391)
Supplement: NIHMS303792-supplement-1_si_001.pdf [file NIHMS303792-supplement-1_si_001.pdf]

Donghang Cheng,<sup>\*,#¶</sup> Sergio Valente,<sup>†¶</sup> Sabrina Castellano,<sup>‡</sup> Gianluca Sbardella,<sup>‡</sup> Roberto Di Santo,<sup>†</sup> Roberta Costi,<sup>†</sup> Mark T. Bedford,<sup>\*,#</sup> and Antonello Mai<sup>\*,†</sup>

**Novel 3,5-Bis(bromohydroxybenzylidene)piperidin-4-ones as Coactivator-associated Arginine Methyltransferase 1 Inhibitors: Enzyme Selectivity and Cellular Activity**

## **SUPPORTING INFORMATION**

## Table of Content

|                                                                                                                                                                              |          |
|------------------------------------------------------------------------------------------------------------------------------------------------------------------------------|----------|
| <b>Chart S1.</b> Known CARM1 inhibitors                                                                                                                                      | page S3  |
| <b>Figure S1.</b> Bis(bromo- and dibromophenol)-containing compounds <b>7a-m</b> lacking the epi-ML behavior and showing some selectivity against CARM1 by fluorograph data. | page S3  |
| <b>Figure S2.</b> <b>7g</b> is a reversible inhibitor of CARM1.                                                                                                              | page S4  |
| <b>Table S1.</b> IC <sub>50</sub> values of selected bis(bromo- and dibromophenol) derivatives <b>7a-m</b> against PRMT1, CARM1, and SET7.                                   | page S5  |
| <b>Scheme S1</b>                                                                                                                                                             | page S5  |
| <b>Chemistry</b>                                                                                                                                                             | page S5  |
| <b>Table S2.</b> Physical and Chemical Data for Compounds <b>8-10</b> .                                                                                                      | page S6  |
| <b>Table S3.</b> Analytical results of compounds <b>7g</b> and <b>8a-l</b> .                                                                                                 | page S7  |
| <b>Table S4.</b> <sup>1</sup> H NMR, <sup>13</sup> C NMR and Mass Spectrum data for compounds <b>7g</b> and <b>8a-d,f-l</b> .                                                | page S7  |
| <b>Plasmids and antibodies</b>                                                                                                                                               | page S9  |
| <b>Cell lines and cultures</b>                                                                                                                                               | page S9  |
| <b>Figure S3.</b> IC <sub>50</sub> curves for <b>7g</b> and <b>8a-l</b> against CARM1/PABP1, PRMT1/NPL3, and SET7/H3.                                                        | page S10 |
| <b>Figure S4.</b> Effects of <b>7g</b> , <b>8e</b> , and <b>8l</b> on Flag-PABP1 methylation in stable Flag-tagged PABP1-inducible HEK293 cells.                             | page S11 |
| <b>References</b>                                                                                                                                                            | page S11 |

**Chart S1.** Known CARM1 inhibitors.

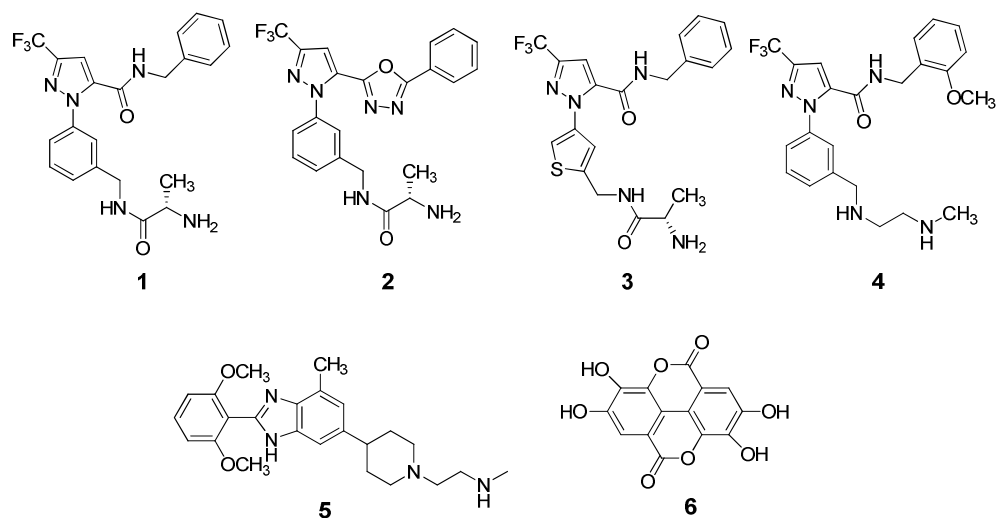

**Figure S1.** Bis(bromo- and dibromophenol)-containing compounds **7a-m** lacking the epi-ML behavior and showing some selectivity against CARM1 by fluorograph data.<sup>1</sup>

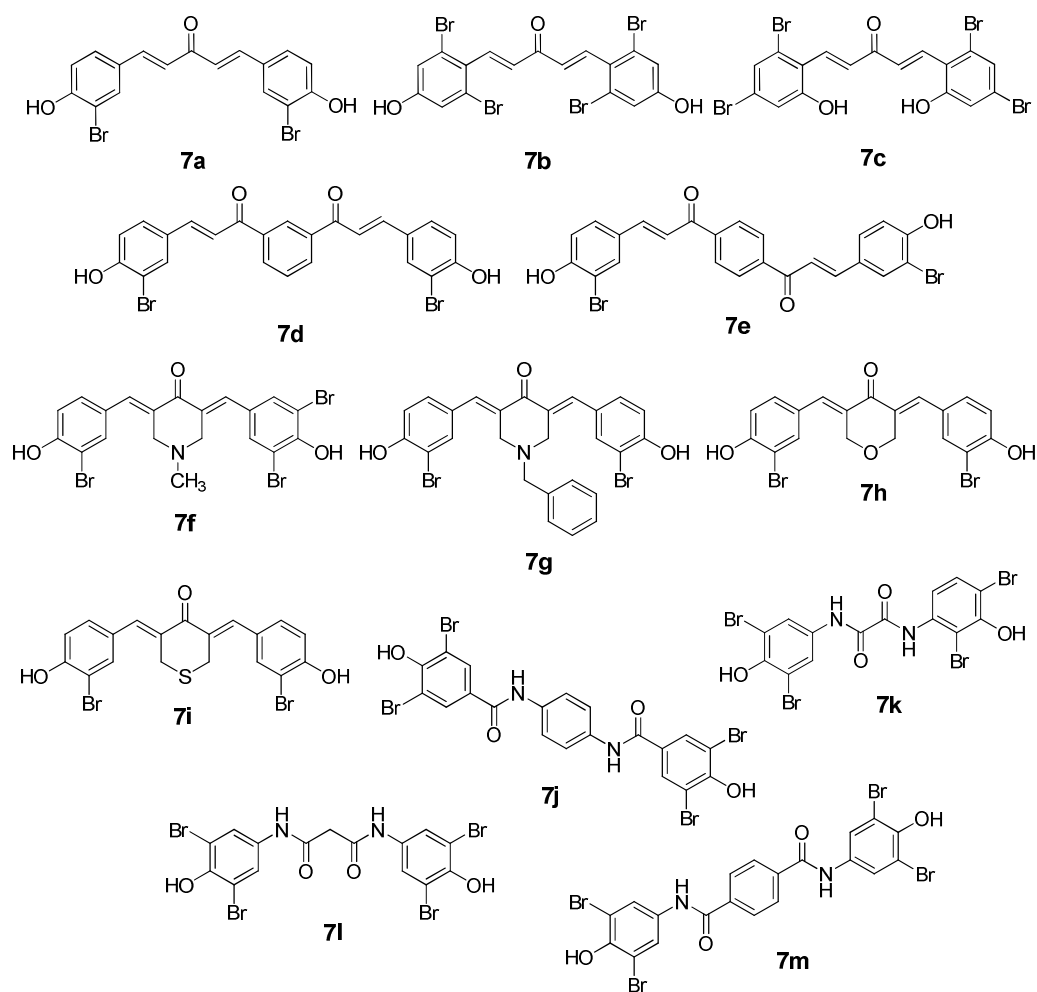

**Figure S2.** **7g** is a reversible inhibitor of CARM1. A dilution experiment was performed, where 100  $\mu\text{M}$  CARM1 enzyme with 500  $\mu\text{M}$  **7g** were preincubated for 90 min and then diluted 1000-fold into reaction mix at final 100 nM CARM1 and 0.5  $\mu\text{M}$  of compound with substrate 0.5  $\mu\text{M}$  PABP1 and 0.5  $\mu\text{M}$  [ $^3\text{H}$ ] AdoMet for 1 h reaction. DMSO and 0.5  $\mu\text{M}$  of **7g** were mixed with 100 nM CARM1 directly to react for 1 h as the controls. The dpm count is depicted.

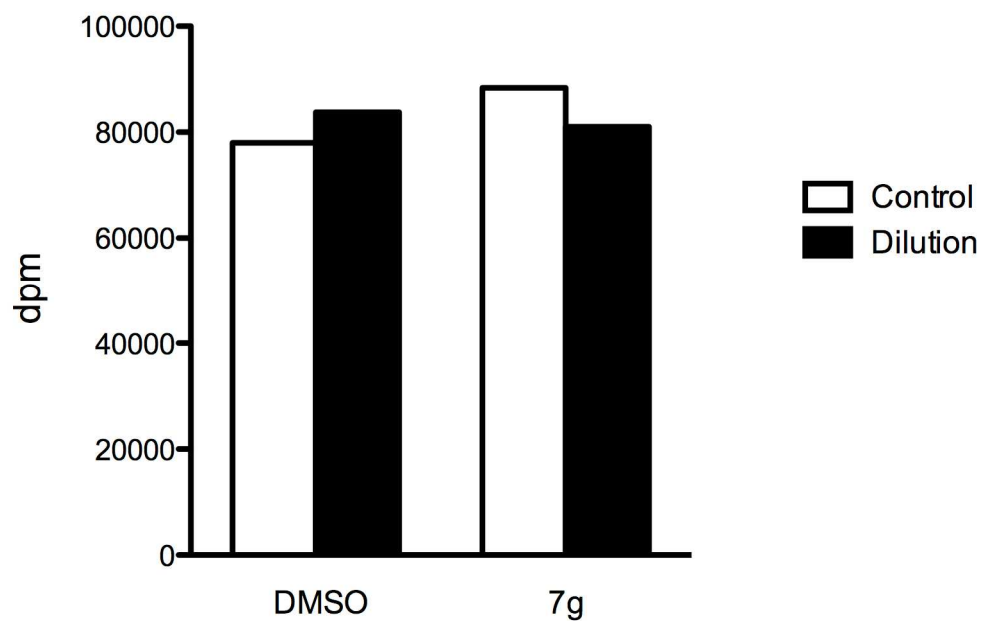

**Table S1.** IC<sub>50</sub> values of selected bis(bromo- and dibromophenol) derivatives **7a-m** against PRMT1, CARM1, and SET7.<sup>a</sup>

| compd                 | IC <sub>50</sub> , μM |                 |             |
|-----------------------|-----------------------|-----------------|-------------|
|                       | PRMT1/<br>NPL3        | CARM1/<br>PABP1 | SET7/<br>H3 |
| <b>7a<sup>b</sup></b> | 11.8                  | 53              | 64          |
| <b>7b<sup>b</sup></b> | 3.4                   | 36              | 37          |
| <b>7c</b>             | 80                    | 20              | >333        |
| <b>7d</b>             | 65                    | 26              | 143         |
| <b>7e</b>             | 34                    | 22              | 701         |
| <b>7f</b>             | 24                    | 59              | 206         |
| <b>7g</b>             | 63                    | 7.1             | 943         |
| <b>7h</b>             | 116                   | 33              | 949         |
| <b>7i</b>             | 16                    | 68              | 206         |
| <b>7j</b>             | 206                   | 95              | 162         |
| <b>7k</b>             | 17.7                  | 21              | >100        |
| <b>7l</b>             | 80                    | 26              | 232         |
| <b>7m</b>             | 166                   | 24              | >667        |

<sup>a</sup>Values are means determined from at least two separate experiments; SDs are within ±10% of the values. <sup>b</sup>Ref. 2.

**Scheme S1<sup>a</sup>**

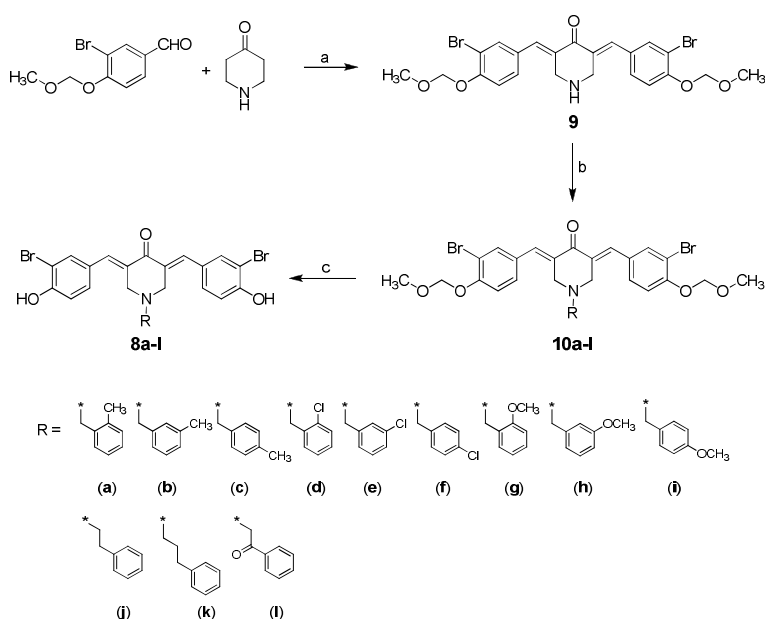

<sup>a</sup>(a) Ba(OH)<sub>2</sub> × 8 H<sub>2</sub>O, MeOH, rt, 2 h; (b) dry K<sub>2</sub>CO<sub>3</sub>, R-Br, CH<sub>3</sub>CN, 60 °C, 1 h; (c) 3N HCl, MeOH, 60 °C, 3 h.

**Chemistry.** Melting points were determined on a Buchi 530 melting point apparatus and are uncorrected. <sup>1</sup>H NMR and <sup>13</sup>C NMR spectra were recorded at 400 MHz on a Bruker AC 400 spectrometer; chemical shifts are reported in δ (ppm) units relative to the internal reference tetramethylsilane (Me<sub>4</sub>Si). EIMS spectra were recorded with a Fisons Trio 1000 spectrometer; only molecular ions (M<sup>+</sup>) and base peaks are given. All compounds were routinely checked by TLC and

<sup>1</sup>H NMR. TLC was performed on aluminum-backed silica gel plates (Merck DC, Alufolien Kieselgel 60 F254) with spots visualized by UV light. All solvents were reagent grade and, when necessary, were purified and dried by standard methods. Concentration of solutions after reactions and extractions involved the use of a rotary evaporator operating at reduced pressure of ca. 20 Torr. Organic solutions were dried over anhydrous sodium sulfate. Analytical results are within ± 0.40% of the theoretical values. All chemicals were purchased from Aldrich Chimica, Milan (Italy), or from Alfa Aesar, Milan (Italy), and were of the highest purity.

**Procedure for the Synthesis of 3,5-bis(3-bromo-4-(methoxymethoxy)benzylidene) piperidin-4-one (9).**

The 3-bromo-4-(methoxymethoxy)benzaldehyde<sup>1</sup> (2.04 mmol, 0.5 g) was added to a suspension of 4-piperidone (1.02 mmol, 0.1 g) and barium hydroxide octahydrate (4.08 mmol, 1.3 g) in methanol (10 mL), and the mixture was kept in stirring for a period of 2 h. After this time, water (30 mL) was added and the solid precipitated was filtered, washed with water (3 × 10 mL) and dried to be purified by chromatographic column eluting with ethyl acetate/*n*-hexane 1/1, to afford pure **9** as a yellow solid. <sup>1</sup>H NMR (CDCl<sub>3</sub>, 400 MHz, δ; ppm) δ 1.90 (bs, 1H, NH), 3.50 (s, 6H, OCH<sub>3</sub>), 4.11 (s, 4H, CH<sub>2</sub> piperidone), 5.27 (s, 4H, CH<sub>2</sub>OCH<sub>3</sub>), 7.17-7.65 (m, 8H, PhCH and benzene protons) ppm; <sup>13</sup>C NMR (CDCl<sub>3</sub>, 400 MHz, δ; ppm) δ 46.6 (2C), 55.6 (2C), 94.2 (2C), 112.1 (2C), 112.2 (2C), 128.4 (2C), 129.2 (2C), 130.9 (2C), 140.6 (2C), 145.9 (2C), 156.2 (2C), 186.0 ppm; MS (EI): *m/z*: 552.99 (*M*)<sup>+</sup>.

**General Procedure for the Synthesis of *N*-substituted-3,5-bis(3-bromo-4-(methoxymethoxy)benzylidene)piperidin-4-ones (10a-l). Example: 3,5-Bis[3-bromo-4-(methoxymethoxy)benzylidene]-1-(2-oxo-2-phenylethyl)piperidin-4-one (10l).**

2-Bromo-1-phenylethanone (1.51 mmol, 0.3 g) was added to a suspension of **9** and dry potassium carbonate (1.81 mmol, 0.3 g) in acetonitrile (15 mL), and the resulting mixture was stirred at 60 °C for 1 h. Then water (50 mL) was added to the reaction, and the precipitate was filtered, washed with water (3 × 10 mL), dried and purified by chromatography eluting with ethyl acetate/*n*-hexane 1/3 to obtain the pure **10l**. <sup>1</sup>H NMR (DMSO-*d*<sub>6</sub>, 400 MHz, δ; ppm) δ 3.38 (s, 6H, OCH<sub>3</sub>), 3.96 (s, 4H, CH<sub>2</sub> piperidone), 4.22 (s, 2H, PhCOCH<sub>2</sub>), 5.31 (s, 4H, CH<sub>2</sub>OCH<sub>3</sub>), 7.23-7.90 (m, 13H, PhCH and benzene protons) ppm; <sup>13</sup>C NMR (DMSO-*d*<sub>6</sub>, 400 MHz, δ; ppm) δ 53.3 (2C), 55.6 (2C), 70.9, 94.2 (2C), 112.1 (2C), 112.2 (2C), 128.4 (2C), 128.6 (2C), 128.8 (2C), 129.2 (2C), 130.9 (2C), 133.1, 135.1, 140.6 (2C), 145.9 (2C), 156.2 (2C), 186.0, 195.3 ppm; MS (EI): *m/z*: 671.03 (*M*)<sup>+</sup>.

**General Procedure for the Synthesis of *N*-substituted-3,5-bis(3-bromo-4-hydroxybenzylidene)piperidin-4-ones (8a-l). Example: 3,5-Bis(3-bromo-4-(hydroxybenzylidene)-1-(3-chlorobenzyl)piperidin-4-one (8e).**

A solution of **10e** (0.42 mmol, 0.3 g) in methanol (5 mL) and 3 N hydrochloric acid (5 mL) was stirred at 60 °C for 3 h, then the suspension was neutralized with 1 N sodium hydrogen carbonate, the precipitated solid was filtered and washed with water (3 × 10 mL) and diethyl ether (3 × 10 mL) to give the pure compound **8e** as a yellow powder. <sup>1</sup>H NMR (DMSO-*d*<sub>6</sub>, 400 MHz, δ; ppm) δ 4.43-4.48 (s, 6H, PhCH<sub>2</sub> and CH<sub>2</sub> piperidone), 7.05-7.74 (m, 12H, PhCH and benzene protons), 11.13 (bs, 2H, OH) ppm; <sup>13</sup>C NMR (DMSO-*d*<sub>6</sub>, 400 MHz, δ; ppm) δ 53.4 (2C), 63.9, 113.7 (2C), 118.0 (2C), 126.0, 126.9, 127.3, 128.7 (2C), 129.6 (2C), 131.3 (2C), 132.2, 134.0, 136.9, 140.6 (2C), 145.9 (2C), 155.8 (2C), 186.0 ppm; MS (EI): *m/z*: 588.95 (*M*)<sup>+</sup>.

**Table S2.** Physical and Chemical Data for Compounds **8-10**<sup>a</sup>

| compd     | mp (°C) | recryst solvent <sup>b</sup> | % yield |
|-----------|---------|------------------------------|---------|
| <b>8a</b> | 220-222 | A                            | 75      |
| <b>8b</b> | 225-227 | A                            | 84      |
| <b>8c</b> | 235-237 | B                            | 89      |
| <b>8d</b> | 253-255 | B                            | 79      |
| <b>8e</b> | 236-238 | B                            | 82      |

|            |         |   |    |
|------------|---------|---|----|
| <b>8f</b>  | >250    | B | 86 |
| <b>8g</b>  | >250    | B | 72 |
| <b>8h</b>  | 210-212 | A | 75 |
| <b>8i</b>  | 235-237 | B | 80 |
| <b>8j</b>  | 206-208 | A | 81 |
| <b>8k</b>  | >250    | B | 83 |
| <b>8l</b>  | >250    | B | 74 |
| <b>9</b>   | 158-160 | C | 77 |
| <b>10a</b> | 172-174 | D | 72 |
| <b>10b</b> | 175-177 | D | 75 |
| <b>10c</b> | 184-186 | D | 83 |
| <b>10d</b> | 202-204 | D | 69 |
| <b>10e</b> | 193-195 | D | 71 |
| <b>10f</b> | 205-207 | D | 76 |
| <b>10g</b> | 215-217 | D | 65 |
| <b>10h</b> | 173-175 | D | 68 |
| <b>10i</b> | 191-193 | D | 74 |
| <b>10j</b> | 168-170 | D | 83 |
| <b>10k</b> | 220-222 | D | 77 |
| <b>10l</b> | 183-185 | D | 85 |

<sup>a</sup>Analytic results were within  $\pm 0.40\%$  of the theoretical values.  
<sup>b</sup>A, acetonitrile/methanol; B, methanol; C, benzene/acetonitrile; D, acetonitrile.

**Table S3.** Analytical results of compounds **7g** and **8a-l**.

| cpd       | MW     | % calcd |      |      |       |      | % found |      |      |       |      |
|-----------|--------|---------|------|------|-------|------|---------|------|------|-------|------|
|           |        | C       | H    | N    | Br    | Cl   | C       | H    | N    | Br    | Cl   |
| <b>7g</b> | 555.26 | 56.24   | 3.81 | 2.52 | 28.78 |      | 56.45   | 3.99 | 2.37 | 28.64 |      |
| <b>8a</b> | 569.28 | 56.96   | 4.07 | 2.46 | 28.07 |      | 57.11   | 4.18 | 2.29 | 27.97 |      |
| <b>8b</b> | 569.28 | 56.96   | 4.07 | 2.46 | 28.07 |      | 56.79   | 3.84 | 2.68 | 28.18 |      |
| <b>8c</b> | 569.28 | 56.96   | 4.07 | 2.46 | 28.07 |      | 57.18   | 4.19 | 2.21 | 27.81 |      |
| <b>8d</b> | 589.70 | 52.96   | 3.42 | 2.38 | 27.10 | 6.01 | 53.17   | 3.51 | 2.12 | 27.28 | 5.83 |
| <b>8e</b> | 589.70 | 52.96   | 3.42 | 2.38 | 27.10 | 6.01 | 53.12   | 3.56 | 2.44 | 27.21 | 5.76 |
| <b>8f</b> | 589.70 | 52.96   | 3.42 | 2.38 | 27.10 | 6.01 | 52.77   | 3.36 | 2.51 | 26.89 | 6.19 |
| <b>8g</b> | 585.28 | 55.41   | 3.96 | 2.39 | 27.3  |      | 55.67   | 4.12 | 2.14 | 27.15 |      |
| <b>8h</b> | 585.28 | 55.41   | 3.96 | 2.39 | 27.3  |      | 55.60   | 4.17 | 2.12 | 27.19 |      |
| <b>8i</b> | 585.28 | 55.41   | 3.96 | 2.39 | 27.3  |      | 55.21   | 3.77 | 2.51 | 27.57 |      |
| <b>8j</b> | 569.28 | 56.96   | 4.07 | 2.46 | 28.07 |      | 57.12   | 4.14 | 2.21 | 27.93 |      |
| <b>8k</b> | 583.31 | 57.65   | 4.32 | 2.40 | 27.40 |      | 57.88   | 4.42 | 2.11 | 27.29 |      |
| <b>8l</b> | 583.27 | 55.60   | 3.63 | 2.40 | 27.40 |      | 55.31   | 3.48 | 2.57 | 27.52 |      |

**Table S4.** <sup>1</sup>H NMR, <sup>13</sup>C NMR and Mass Spectrum data for compounds **7g** and **8a-d,f-l**.

**3,5-bis(3-bromo-4-hydroxybenzylidene)-1-benzylpiperidin-4-one (7g):** <sup>1</sup>H NMR (DMSO-*d*<sub>6</sub>, 400 MHz,  $\delta$ ; ppm)  $\delta$  4.45 (s, 6H, PhCH<sub>2</sub> and CH<sub>2</sub> piperidone), 7.05-7.40 (m, 9H, benzene protons), 7.62 (s, 2H, PhCH), 7.74 (s, 2H, benzene protons), 11.14 (bs, 2H, OH) ppm; <sup>13</sup>C NMR (DMSO-*d*<sub>6</sub>, 400 MHz,  $\delta$ ; ppm)  $\delta$  53.40 (2C), 64.40, 113.70 (2C), 118.0 (2C), 127.20, 128.40 (2C), 128.70 (2C), 128.80 (2C), 129.60 (2C), 131.30 (2C), 132.60, 140.60 (2C), 145.90 (2C), 155.80 (2C), 186.0 ppm; MS (EI): *m/z*: 554.99 (*M*)<sup>+</sup>

**3,5-bis(3-bromo-4-hydroxybenzylidene)-1-(2-methylbenzyl)piperidin-4-one (8a):**  $^1\text{H}$  NMR (DMSO- $d_6$ , 400 MHz,  $\delta$ ; ppm)  $\delta$  2.41 (s, 3H,  $\text{CH}_3$ ), 4.54 (s, 6H,  $\text{PhCH}_2$  and  $\text{CH}_2$  piperidone), 7.06-7.34 (m, 7H, benzene protons), 7.48-7.51 (t, 1H, benzene proton), 7.61 (s, 2H,  $\text{PhCH}$ ), 7.73 (s, 2H, benzene protons), 11.17 (bs, 2H,  $\text{OH}$ ) ppm;  $^{13}\text{C}$  NMR (DMSO- $d_6$ , 400 MHz,  $\delta$ ; ppm)  $\delta$  18.80, 53.40 (2C), 60.70, 113.70 (2C), 118.0 (2C), 125.40, 127.10, 128.70 (2C), 129.60 (2C), 129.90, 131.30 (2C), 136.60, 137.70, 140.60 (2C), 145.90 (2C), 155.80 (2C), 186.0 ppm; MS (EI):  $m/z$ : 569.00 ( $M$ ) $^+$ .

**3,5-bis(3-bromo-4-hydroxybenzylidene)-1-(3-methylbenzyl)piperidin-4-one (8b):**  $^1\text{H}$  NMR (DMSO- $d_6$ , 400 MHz,  $\delta$ ; ppm)  $\delta$  2.17 (s, 3H,  $\text{CH}_3$ ), 4.50 (s, 6H,  $\text{PhCH}_2$  and  $\text{CH}_2$  piperidone), 7.00-7.40 (m, 8H, benzene protons), 7.50 (s, 2H,  $\text{PhCH}$ ), 7.66 (s, 2H, benzene protons), 11.15 (bs, 2H,  $\text{OH}$ ) ppm;  $^{13}\text{C}$  NMR (DMSO- $d_6$ , 400 MHz,  $\delta$ ; ppm)  $\delta$  21.60, 53.40 (2C), 64.70, 113.70 (2C), 118.0 (2C), 125.80, 127.50, 128.30, 128.70 (2C), 129.60 (2C), 130.70, 131.30 (2C), 138.10, 138.50, 140.60 (2C), 145.90 (2C), 155.80 (2C), 186.0 ppm; MS (EI):  $m/z$ : 569.00 ( $M$ ) $^+$ .

**3,5-bis(3-bromo-4-hydroxybenzylidene)-1-(4-methylbenzyl)piperidin-4-one (8c):**  $^1\text{H}$  NMR (DMSO- $d_6$ , 400 MHz,  $\delta$ ; ppm)  $\delta$  2.23 (s, 3H,  $\text{CH}_3$ ), 4.42 (s, 4H,  $\text{CH}_2$  piperidone), 4.49 (s, 2H,  $\text{PhCH}_2$ ), 7.05-7.40 (m, 8H, benzene protons), 7.62 (s, 2H,  $\text{PhCH}$ ), 7.74 (s, 2H, benzene protons), 11.14 (bs, 2H,  $\text{OH}$ ) ppm;  $^{13}\text{C}$  NMR (DMSO- $d_6$ , 400 MHz,  $\delta$ ; ppm)  $\delta$  21.30, 53.40 (2C), 64.40, 113.70 (2C), 118.0 (2C), 128.70 (4C), 129.60 (2C), 130.0 (2C), 131.30 (2C), 135.60, 136.90, 140.60 (2C), 145.90 (2C), 155.80 (2C), 186.0 ppm; MS (EI):  $m/z$ : 569.00 ( $M$ ) $^+$ .

**3,5-bis(3-bromo-4-hydroxybenzylidene)-1-(2-chlorobenzyl)piperidin-4-one (8d):**  $^1\text{H}$  NMR (DMSO- $d_6$ , 400 MHz,  $\delta$ ; ppm)  $\delta$  4.52 (s, 6H,  $\text{PhCH}_2$  and  $\text{CH}_2$  piperidone), 7.04-7.07 (d, 2H, benzene protons), 7.32-7.37 (m, 4H, benzene protons), 7.50-7.53 (d, 1H, benzene proton), 7.62 (s, 2H,  $\text{PhCH}$ ), 7.69 (s, 2H, benzene protons), 11.17 (bs, 2H,  $\text{OH}$ ) ppm;  $^{13}\text{C}$  NMR (DMSO- $d_6$ , 400 MHz,  $\delta$ ; ppm)  $\delta$  53.40 (2C), 58.10, 113.70 (2C), 118.0 (2C), 126.50, 128.50, 128.60, 128.70 (2C), 129.60 (2C), 131.30 (2C), 134.10, 136.30, 140.60 (2C), 145.90 (2C), 155.80 (2C), 186.0 ppm; MS (EI):  $m/z$ : 588.95 ( $M$ ) $^+$ .

**3,5-bis(3-bromo-4-hydroxybenzylidene)-1-(4-chlorobenzyl)piperidin-4-one (8f):**  $^1\text{H}$  NMR (DMSO- $d_6$ , 400 MHz,  $\delta$ ; ppm)  $\delta$  4.45 (s, 6H,  $\text{PhCH}_2$  and  $\text{CH}_2$  piperidone), 7.05-7.07 (d, 2H, benzene protons), 7.31-7.33 (d, 2H, benzene protons), 7.39-7.41 (d, 2H, benzene protons), 7.54-7.56 (d, 2H, benzene protons), 7.61 (s, 2H,  $\text{PhCH}$ ), 7.73 (s, 2H, benzene protons), 11.14 (bs, 2H,  $\text{OH}$ ) ppm;  $^{13}\text{C}$  NMR (DMSO- $d_6$ , 400 MHz,  $\delta$ ; ppm)  $\delta$  53.40 (2C), 64.40, 113.70 (2C), 118.0 (2C), 128.50 (2C), 128.70 (2C), 129.60 (2C), 131.20 (2C), 131.30 (2C), 132.80, 136.70, 140.60 (2C), 145.90 (2C), 155.80 (2C), 186.0 ppm; MS (EI):  $m/z$ : 588.95 ( $M$ ) $^+$ .

**3,5-bis(3-bromo-4-hydroxybenzylidene)-1-(2-methoxybenzyl)piperidin-4-one (8g):**  $^1\text{H}$  NMR (DMSO- $d_6$ , 400 MHz,  $\delta$ ; ppm)  $\delta$  3.69 (s, 3H,  $\text{OCH}_3$ ), 4.44 (s, 2H,  $\text{PhCH}_2$ ), 4.51 (s, 4H,  $\text{CH}_2$  piperidone), 6.90-7.33 (m, 8H, benzene protons), 7.63 (s, 2H,  $\text{PhCH}$ ), 7.74 (s, 2H, benzene protons), 11.14 (bs, 2H,  $\text{OH}$ ) ppm;  $^{13}\text{C}$  NMR (DMSO- $d_6$ , 400 MHz,  $\delta$ ; ppm)  $\delta$  53.40 (2C), 56.10, 57.30, 112.0, 113.70 (2C), 118.0 (2C), 120.70, 126.50, 128.20, 128.70 (2C), 129.60 (2C), 129.80, 131.30 (2C), 140.60 (2C), 145.90 (2C), 155.80 (2C), 158.40, 186.0 ppm; MS (EI):  $m/z$ : 585.00 ( $M$ ) $^+$ .

**3,5-bis(3-bromo-4-hydroxybenzylidene)-1-(3-methoxybenzyl)piperidin-4-one (8h):**  $^1\text{H}$  NMR (DMSO- $d_6$ , 400 MHz,  $\delta$ ; ppm)  $\delta$  3.69 (s, 3H,  $\text{OCH}_3$ ), 4.44 (s, 2H,  $\text{PhCH}_2$ ), 4.51 (s, 4H,  $\text{CH}_2$  piperidone), 7.00-7.33 (m, 8H, benzene protons), 7.63 (s, 2H,  $\text{PhCH}$ ), 7.74 (s, 2H, benzene protons), 11.14 (bs, 2H,  $\text{OH}$ ) ppm;  $^{13}\text{C}$  NMR (DMSO- $d_6$ , 400 MHz,  $\delta$ ; ppm)  $\delta$  53.40 (2C), 55.80, 64.70, 112.80, 112.90, 113.70 (2C), 118.0 (2C), 128.70 (2C), 129.40, 129.60 (2C), 131.30 (2C), 140.60 (2C), 140.90, 145.90 (2C), 155.80 (2C), 160.30, 186.0 ppm; MS (EI):  $m/z$ : 585.00 ( $M$ ) $^+$ .

**3,5-bis(3-bromo-4-hydroxybenzylidene)-1-(4-methoxybenzyl)piperidin-4-one (8i):**  $^1\text{H}$  NMR (DMSO- $d_6$ , 400 MHz,  $\delta$ ; ppm)  $\delta$  3.70 (s, 3H,  $\text{OCH}_3$ ), 4.44 (s, 2H,  $\text{PhCH}_2$ ), 4.51 (s, 4H,  $\text{CH}_2$  piperidone), 4.43 (s, 2H,  $\text{PhCH}_2$ ), 4.50 (s, 4H,  $\text{CH}_2$  piperidone), 7.05-7.33 (m, 8H, benzene protons), 7.63 (s, 2H,  $\text{PhCH}$ ), 7.74 (s, 2H, benzene protons), 11.14 (bs, 2H,  $\text{OH}$ ) ppm;  $^{13}\text{C}$  NMR (DMSO- $d_6$ , 400 MHz,  $\delta$ ; ppm)  $\delta$  53.40 (2C), 55.80, 64.40, 113.70 (2C), 114.0 (2C), 118.0 (2C),



128.70 (2C), 129.60 (2C), 130.90, 131.30 (2C), 132.40, 140.60 (2C), 145.90 (2C), 155.80 (2C), 159.10, 186.0 ppm; MS (EI):  $m/z$ : 585.00 ( $M$ )<sup>+</sup>.

**3,5-bis(3-bromo-4-hydroxybenzylidene)-1-phenethylpiperidin-4-one (8j):** <sup>1</sup>H NMR (DMSO-*d*<sub>6</sub>, 400 MHz,  $\delta$ ; ppm)  $\delta$  2.70-2.73 (t, 2H, PhCH<sub>2</sub>CH<sub>2</sub>), 2.75-2.78 (t, 2H, PhCH<sub>2</sub>CH<sub>2</sub>), 4.55 (s, 4H, CH<sub>2</sub> piperidone), 7.10-7.45 (m, 9H, benzene protons), 7.48 (s, 2H, PhCH), 7.72 (s, 2H, benzene protons), 11.15 (bs, 2H, OH) ppm; <sup>13</sup>C NMR (DMSO-*d*<sub>6</sub>, 400 MHz,  $\delta$ ; ppm)  $\delta$  33.60, 53.80 (2C), 58.90, 113.70 (2C), 118.0 (2C), 125.90, 127.70 (2C), 128.60 (2C), 128.70 (2C), 129.60 (2C), 131.30 (2C), 139.40, 140.60 (2C), 145.90 (2C), 155.80 (2C), 186.0 ppm; MS (EI):  $m/z$ : 569.00 ( $M$ )<sup>+</sup>.

**3,5-bis(3-bromo-4-hydroxybenzylidene)-1-(3-phenylpropyl)piperidin-4-one (8k):** <sup>1</sup>H NMR (DMSO-*d*<sub>6</sub>, 400 MHz,  $\delta$ ; ppm)  $\delta$  1.95-2.00 (m, 2H, PhCH<sub>2</sub>CH<sub>2</sub>CH<sub>2</sub>), 2.50-2.53 (t, 2H, PhCH<sub>2</sub>CH<sub>2</sub>CH<sub>2</sub>), 3.25-3.28 (t, 2H, PhCH<sub>2</sub>CH<sub>2</sub>CH<sub>2</sub>), 4.55 (s, 4H, CH<sub>2</sub> piperidone), 7.09-7.37 (m, 9H, benzene protons), 7.71 (s, 2H, PhCH), 7.73 (s, 2H, benzene protons), 11.15 (bs, 2H, OH) ppm; <sup>13</sup>C NMR (DMSO-*d*<sub>6</sub>, 400 MHz,  $\delta$ ; ppm)  $\delta$  27.50, 31.0, 53.80 (2C), 57.0, 113.70 (2C), 118.0 (2C), 126.0, 128.10 (2C), 128.70 (2C), 128.80 (2C), 129.60 (2C), 131.30 (2C), 140.60 (2C), 142.0, 145.90 (2C), 155.80 (2C), 186.0 ppm; MS (EI):  $m/z$ : 583.02 ( $M$ )<sup>+</sup>.

**3,5-bis(3-bromo-4-hydroxybenzylidene)-1-(2-oxo-2-phenylethyl)piperidin-4-one (8l):** <sup>1</sup>H NMR (DMSO-*d*<sub>6</sub>, 400 MHz,  $\delta$ ; ppm)  $\delta$  3.92 (s, 4H, CH<sub>2</sub> piperidone), 4.22 (s, 2H, PhCOCH<sub>2</sub>), 6.97-7.00 (d, 2H, benzene protons), 7.27-7.30 (d, 2H, benzene protons), 7.44-7.60 (m, 7H, PhCH and benzene protons), 7.92-7.95 (d, 2H, benzene protons), 10.85 (bs, 2H, OH) ppm; <sup>13</sup>C NMR (DMSO-*d*<sub>6</sub>, 400 MHz,  $\delta$ ; ppm)  $\delta$  53.30 (2C), 70.90, 113.70 (2C), 118.0 (2C), 128.60 (2C), 128.70 (2C), 128.80 (2C), 129.60 (2C), 131.30 (2C), 133.10, 135.10, 140.60 (2C), 145.90 (2C), 155.80 (2C), 186.0, 195.30 ppm; MS (EI):  $m/z$ : 582.98 ( $M$ )<sup>+</sup>.

**Plasmids and antibodies.** All amplified fragments were subcloned into a glutathione S-transferase (GST) bacterial expression vector pGEX-6p-1 (Amersham Biosciences). GST-PABP1,<sup>3</sup> GST-SMB,<sup>4</sup> GST-rPS2<sup>5</sup> and GST-CA150<sup>6</sup> have been described. GST-PRMT1, GST-PRMT3, GST-PRMT4, and GST-PRMT6 have been described.<sup>7</sup> GST-Npl3 was a gift from Pam Silver and has been described previously.<sup>8</sup> GST-Suv39H1 was a gift from Thomas Jenuwein.<sup>9</sup> GST-SET7 and GST-DOT1 were gifts from Yi Zhang.<sup>10</sup> GST-G9a was a gift from Yoichi Shinkai.<sup>11</sup> Myc-PRMT5 was a gift from Stéphane Richard. The PSA-LUC plasmid was kindly provided by Dr. Roland Schüle (Freiburg, Germany).<sup>48</sup> Histones H3 and H4 (calf thymus) were purchased from Roche Applied Science. The methyl-specific PABP1 antibody was raised in rabbits against peptides sequence (CGAIR\*PAAPR\*PPFS) of PABP1. The anti-FLAG antibody M2 and anti- $\beta$ -actin antibodies were purchased from Sigma-Aldrich, and anti-c-Myc antibody from Covance.

**Cell lines and cultures.** A stable/inducible T-Rex-3XFlag-PABP1 cell line was established by transfection with pcDNA/FRT/TO-3XFlag-PABP1 and pOG44 plasmids into Flp-in T-Rex HEK293 cells (Invitrogen). Transfected cells were maintained in Dulbecco's modified Eagle's medium containing 10% fetal bovine serum supplemented with 10  $\mu$ g/mL blasticidin and 100  $\mu$ g/mL hygromycin. The resistant single colony was picked up to propagate. The human prostate cancer cell lines LNCaP (American Type Tissue Collection) were grown in RPMI-1640 media with 10% fetal bovine serum (FBS) and antibiotics (penicillin 100 U/mL, streptomycin 100  $\mu$ g/mL).

**Figure S3.** IC<sub>50</sub> curves for **7g** and **8a-l** against CARM1/PABP1, PRMT1/NPL3, and SET7/H3.

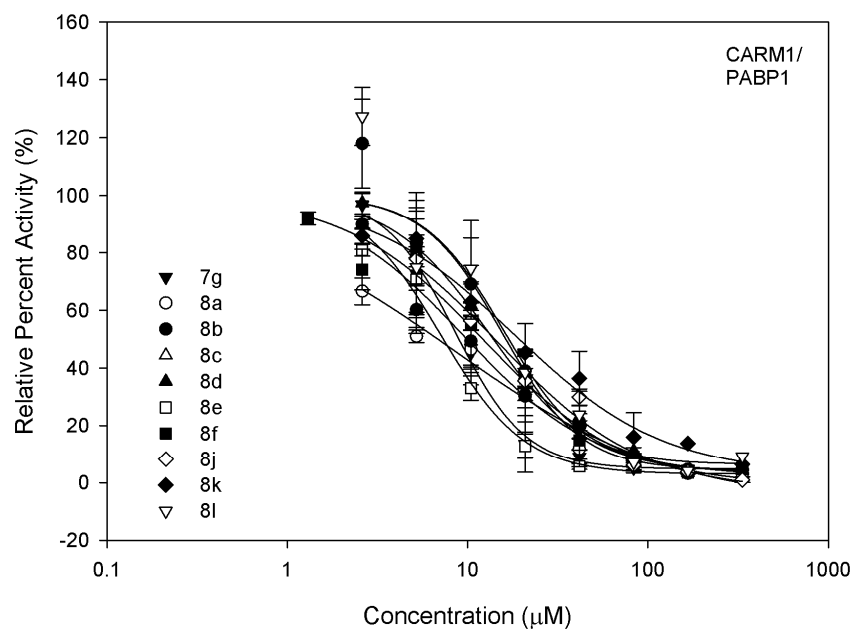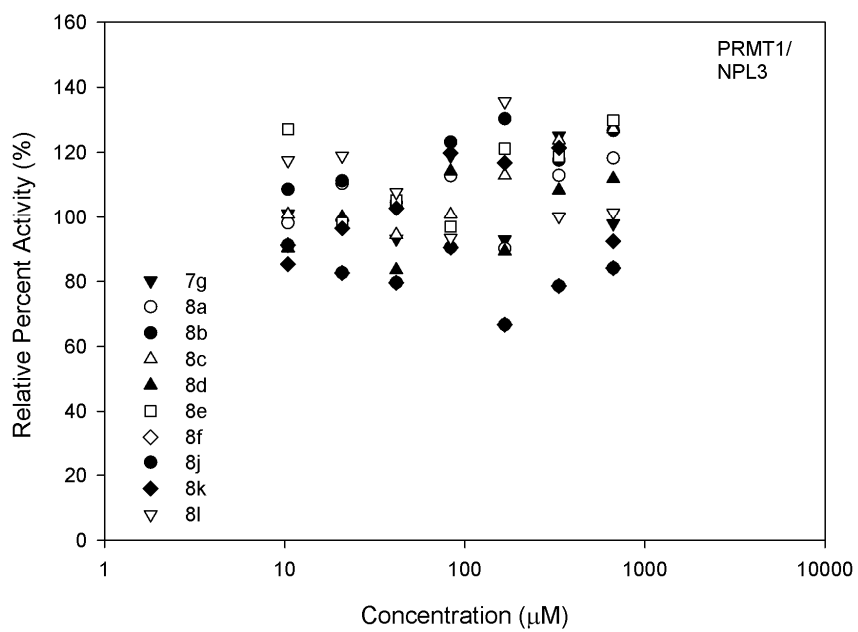

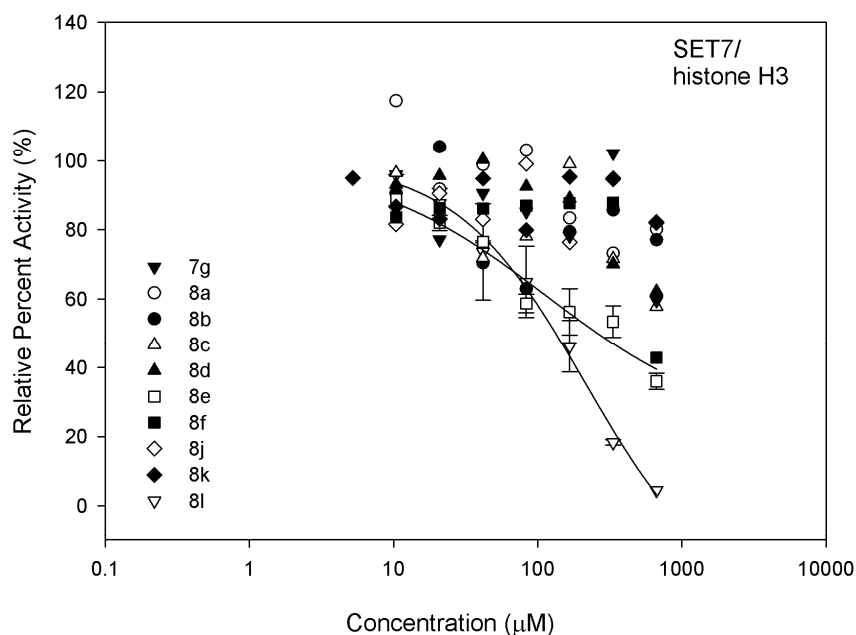

**Figure S4.** Effects of **7g**, **8e**, and **8l** on Flag-PABP1 methylation in stable Flag-tagged PABP1-inducible HEK293 cells.

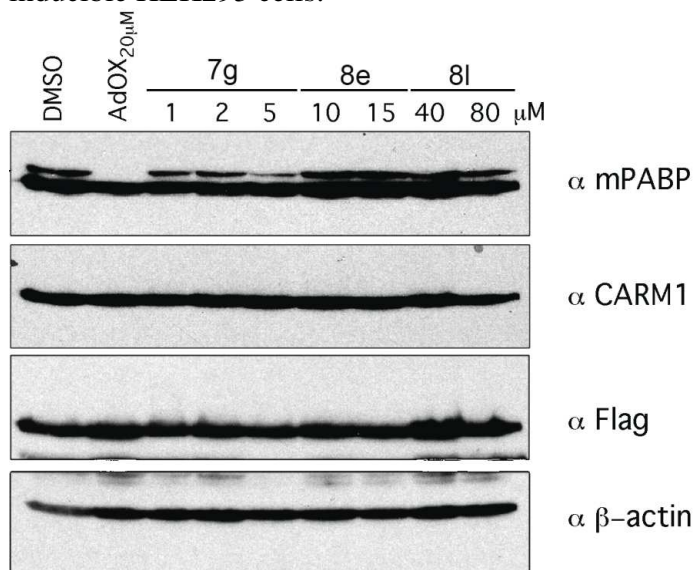

## References

- Mai, A.; Cheng, D.; Bedford, M. T.; Valente, S.; Nebbioso, A.; Perrone, A.; Brosch, G.; Sbardella, G.; De Bellis, F.; Miceli, M.; Altucci, L. epigenetic multiple ligands: mixed histone/protein methyltransferase, acetyltransferase, and class III deacetylase (sirtuin) inhibitors. *J Med Chem* **2008**, *51*, 2279-90.

2. Mai, A.; Valente, S.; Cheng, D.; Perrone, A.; Ragno, R.; Simeoni, S.; Sbardella, G.; Brosch, G.; Nebbioso, A.; Conte, M.; Altucci, L.; Bedford, M. T. Synthesis and biological validation of novel synthetic histone/protein methyltransferase inhibitors. *ChemMedChem* **2007**, *2*, 987-91.
3. Lee, J.; Bedford, M. T. PABP1 identified as an arginine methyltransferase substrate using high-density protein arrays. *EMBO Rep* **2002**, *3*, 268-73.
4. Bedford, M. T.; Reed, R.; Leder, P. WW domain-mediated interactions reveal a spliceosome-associated protein that binds a third class of proline-rich motif: the proline glycine and methionine-rich motif. *Proc Natl Acad Sci U S A* **1998**, *95*, 10602-7.
5. Swiercz, R.; Person, M. D.; Bedford, M. T. Ribosomal protein S2 is a substrate for mammalian PRMT3 (protein arginine methyltransferase 3). *Biochem J* **2005**, *386*, 85-91.
6. Cheng, D.; Cote, J.; Shaaban, S.; Bedford, M. T. The arginine methyltransferase CARM1 regulates the coupling of transcription and mRNA processing. *Mol Cell* **2007**, *25*, 71-83.
7. Frankel, A.; Yadav, N.; Lee, J.; Branscombe, T. L.; Clarke, S.; Bedford, M. T. The novel human protein arginine N-methyltransferase PRMT6 is a nuclear enzyme displaying unique substrate specificity. *J Biol Chem* **2002**, *277*, 3537-43.
8. Weiss, V. H.; McBride, A. E.; Soriano, M. A.; Filman, D. J.; Silver, P. A.; Hogle, J. M. The structure and oligomerization of the yeast arginine methyltransferase, Hmt1. *Nat Struct Biol* **2000**, *7*, 1165-71.
9. O'Carroll, D.; Scherthan, H.; Peters, A. H.; Opravil, S.; Haynes, A. R.; Laible, G.; Rea, S.; Schmid, M.; Lebersorger, A.; Jerratsch, M.; Sattler, L.; Mattei, M. G.; Denny, P.; Brown, S. D.; Schweizer, D.; Jenuwein, T. Isolation and characterization of Suv39h2, a second histone H3 methyltransferase gene that displays testis-specific expression. *Mol Cell Biol* **2000**, *20*, 9423-33.
10. Wang, H.; Cao, R.; Xia, L.; Erdjument-Bromage, H.; Borchers, C.; Tempst, P.; Zhang, Y. Purification and functional characterization of a histone H3-lysine 4-specific methyltransferase. *Mol Cell* **2001**, *8*, 1207-17.
11. Tachibana, M.; Sugimoto, K.; Fukushima, T.; Shinkai, Y. Set domain-containing protein, G9a, is a novel lysine-preferring mammalian histone methyltransferase with hyperactivity and specific selectivity to lysines 9 and 27 of histone H3. *J Biol Chem* **2001**, *276*, 25309-17.
